# Supplementary material for: A comparative study of moisture adsorption on GO, MOF-5, and GO/MOF-5 composite for applications in atmospheric water harvesting
Source: Royal Society of Chemistry journal article supplement (doi:10.1039/d4na00150h), 2024-01-01
Supplement: d4na00150h1.pdf [file d4na00150h1.pdf]

## Point of Zero charge

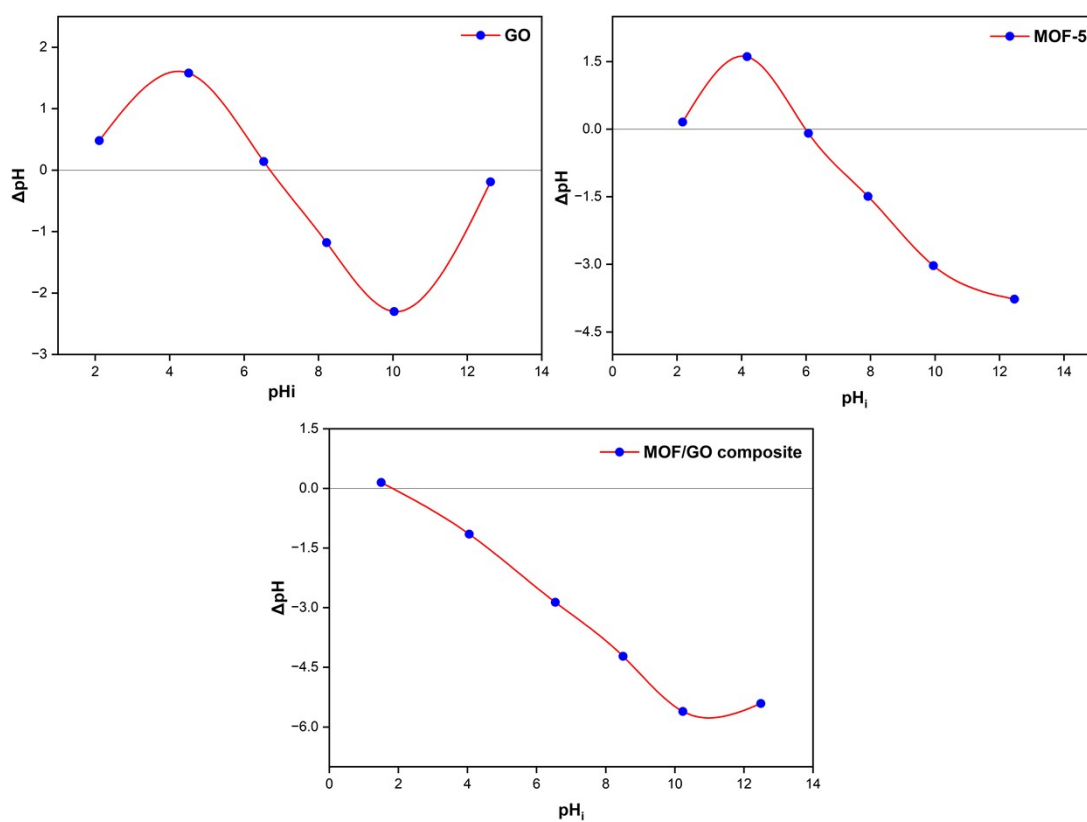

Figure S1: Change in pH versus initial pH for GO, MOF-5, and GO/MOF-5

## Moisture Content Graphs

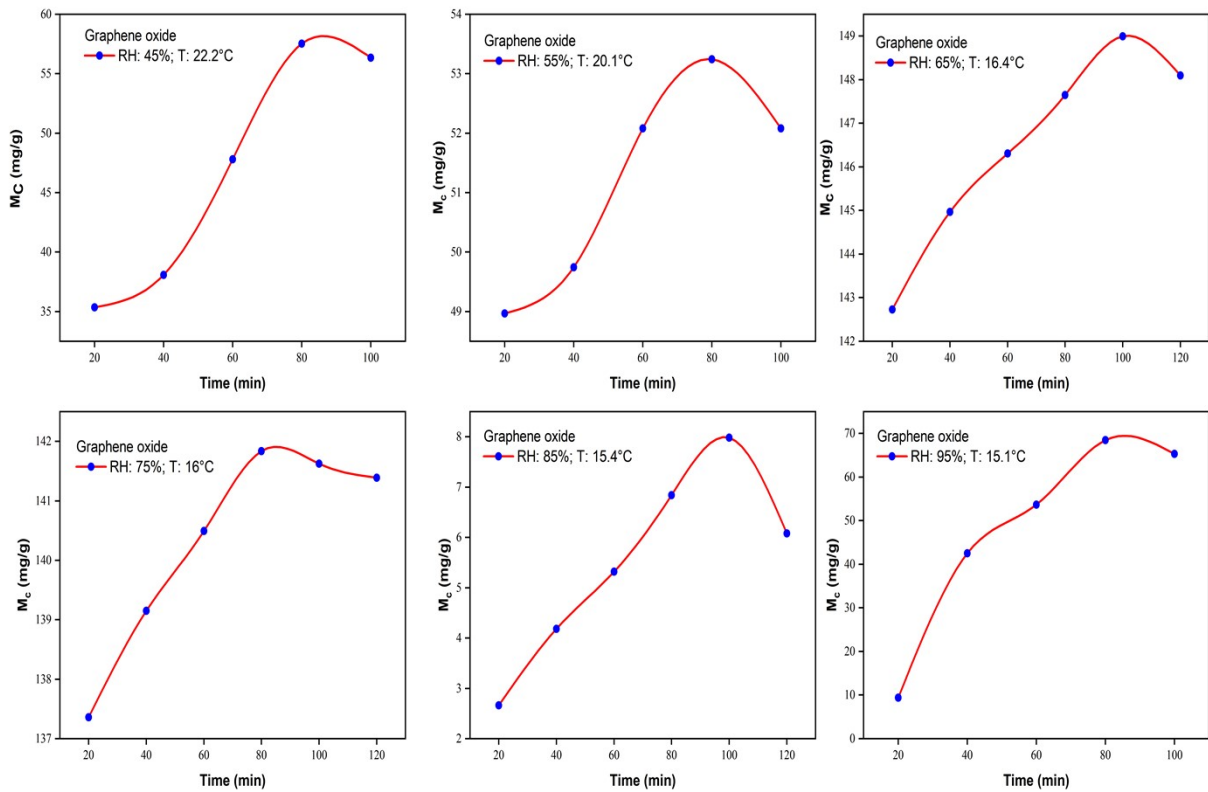

Figure S2: Moisture Content (Mc) against time for synthesized GO at different RH%

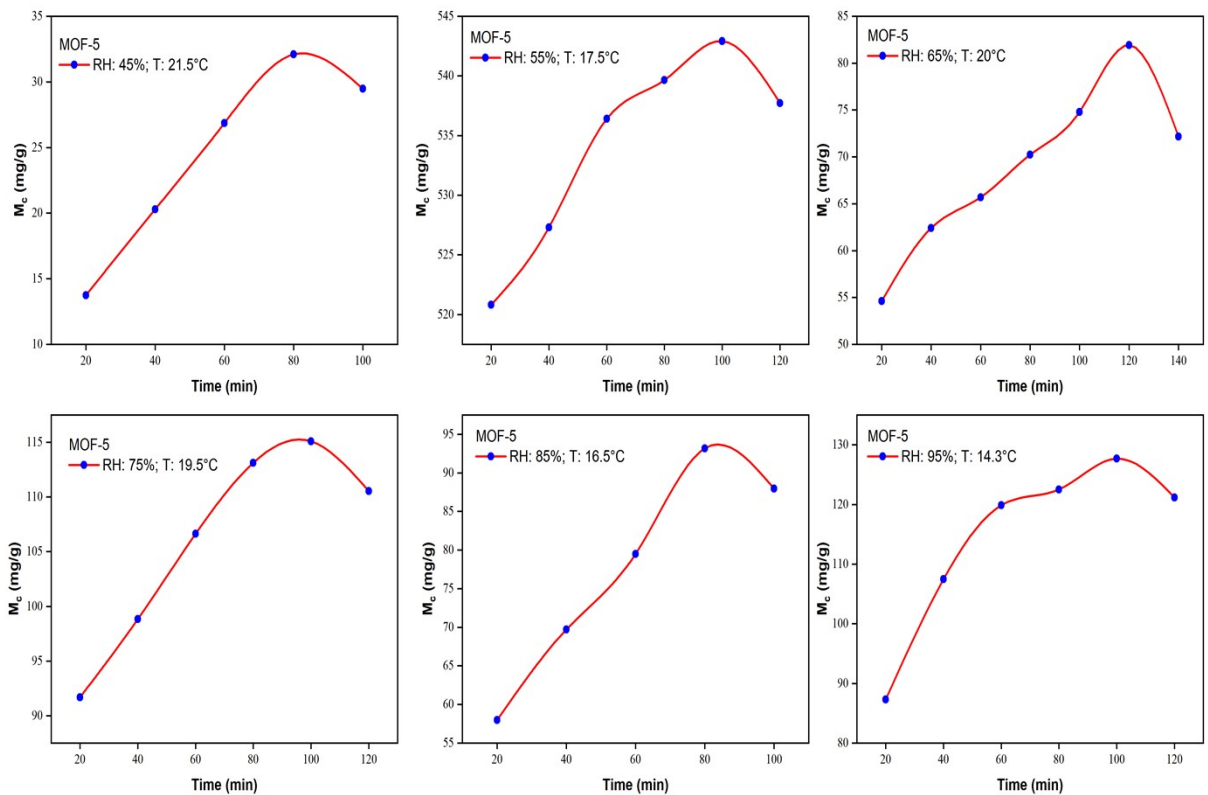

Figure S3: Moisture Content (Mc) against time for synthesized MOF-5 at different RH%

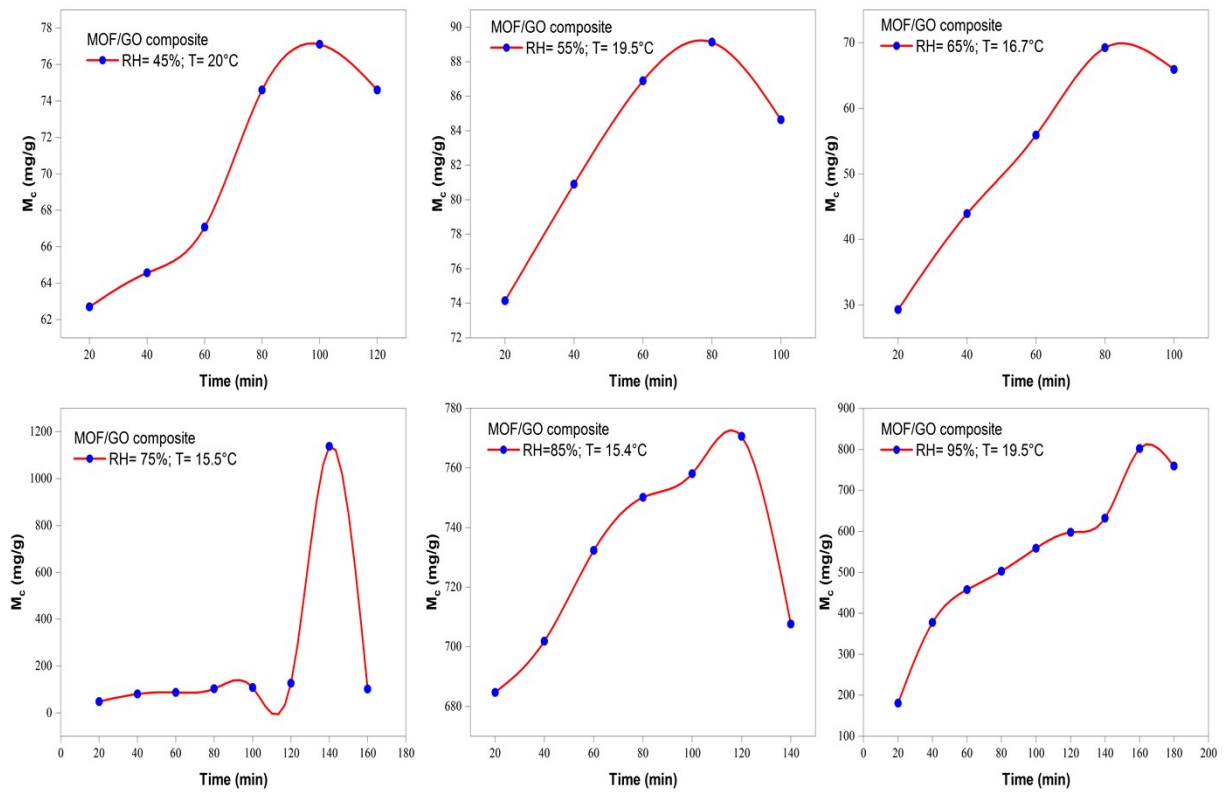

Figure S4: Moisture Content ( $M_c$ ) against time for synthesized GO/MOF-5 at different RH%

### Equilibrium Moisture Content ( $X_e$ ) v/s Water Activity

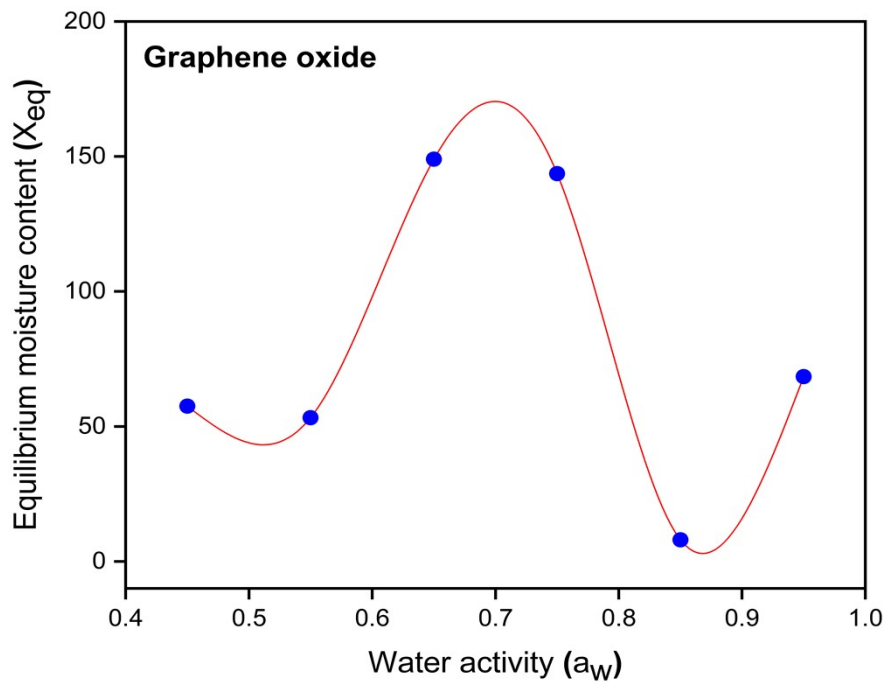

Figure S5:  $X_{eq}$  versus  $a_w$  for synthesized graphene oxide

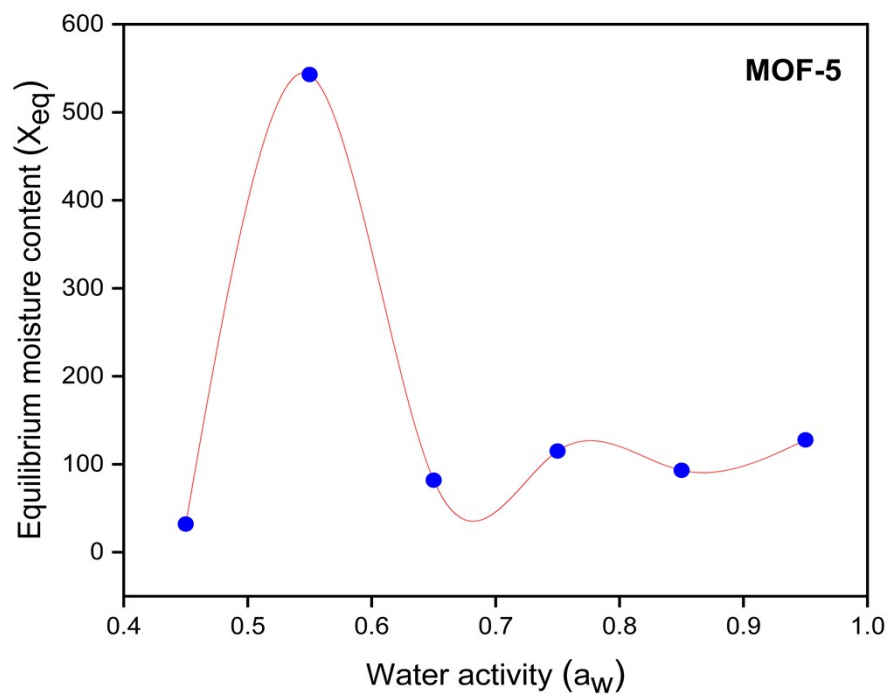

Figure S6:  $X_{eq}$  versus  $a_w$  for MOF-5

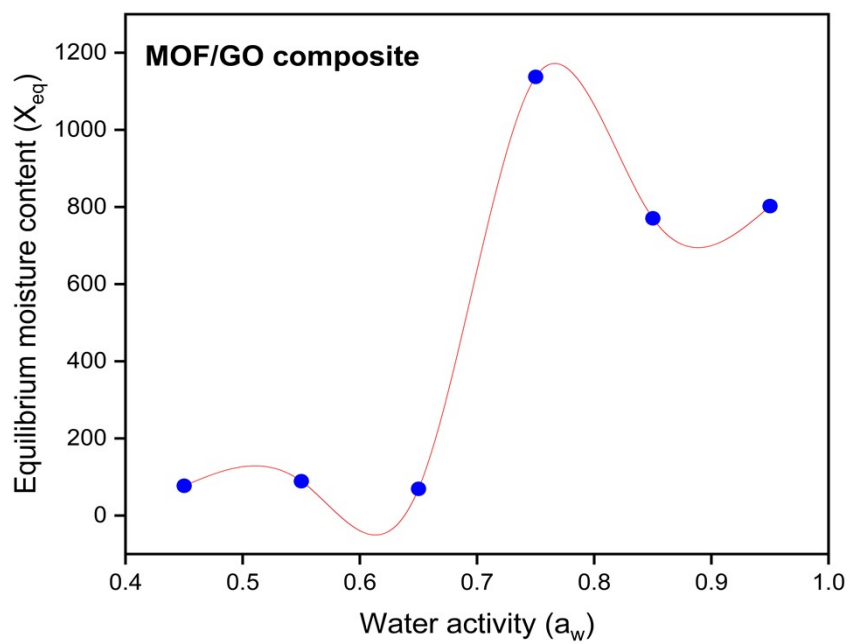

Figure S7:  $X_{eq}$  versus  $a_w$  for GO/MOF-5

## Thermodynamics study of GO:

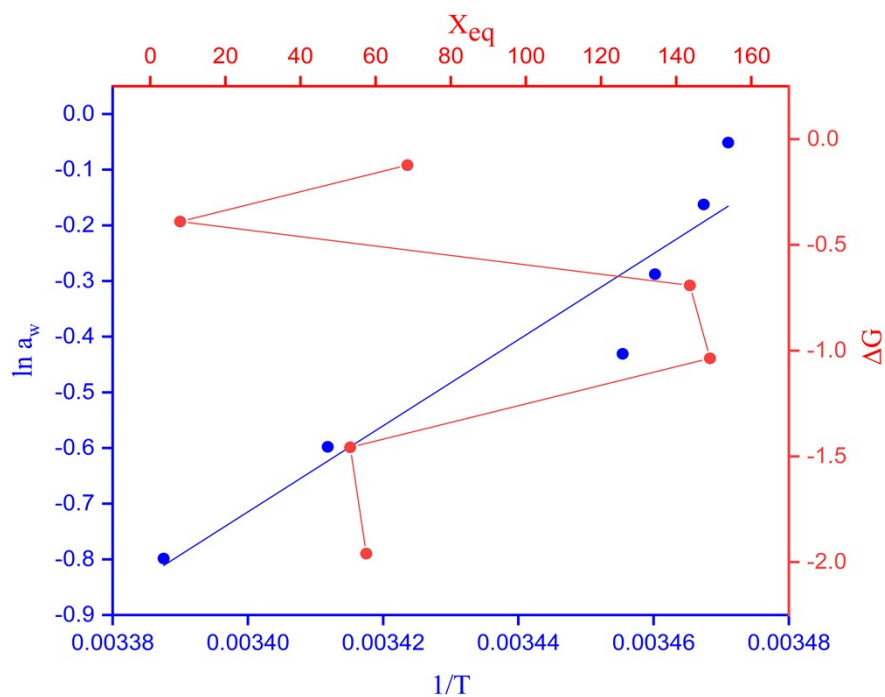

Figure S8: Relationship between change in Gibbs free energy versus  $X_{eq}$  and  $\ln a_w$  versus  $1/T$  for GO

## Thermodynamics study of MOF-5:

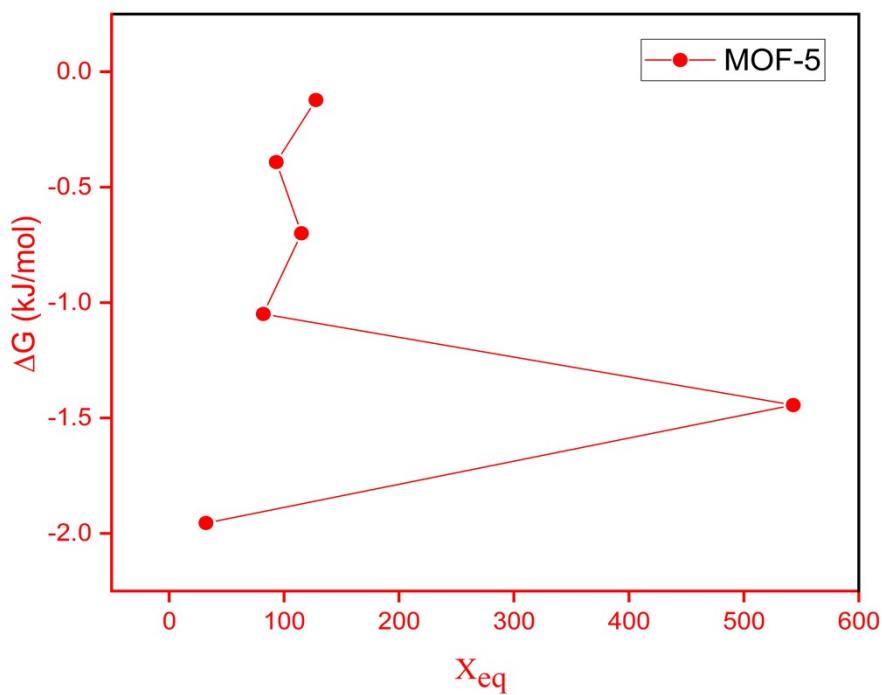

Figure S9: Relationship between change in Gibbs free energy versus  $X_{eq}$  for MOF-5

### Thermodynamics study of GO/MOF-5 Composite:

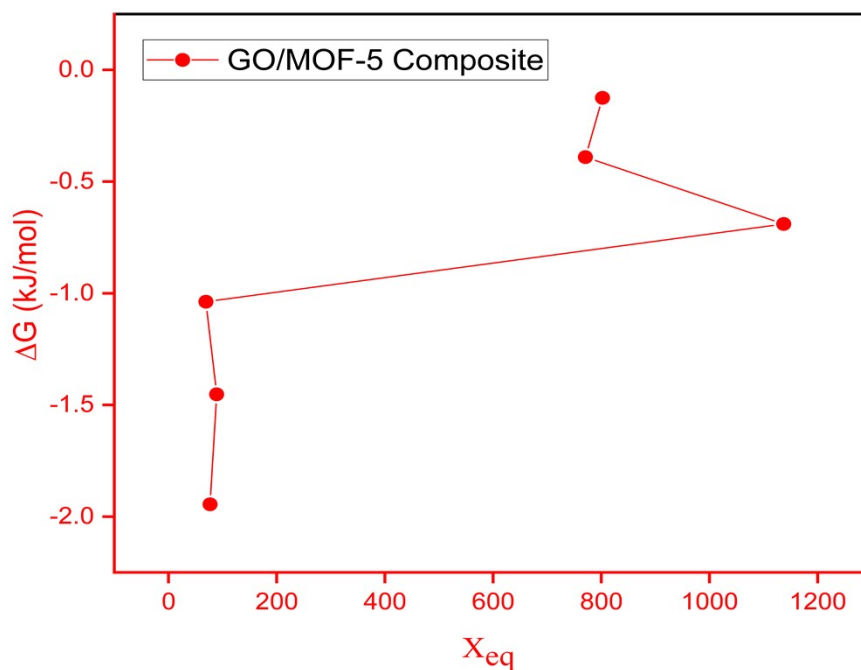

Figure S10: Relationship between change in Gibbs free energy versus  $X_{eq}$  for GO/MOF-5 composite

### Pseudo 2<sup>nd</sup> order kinetic Graphs

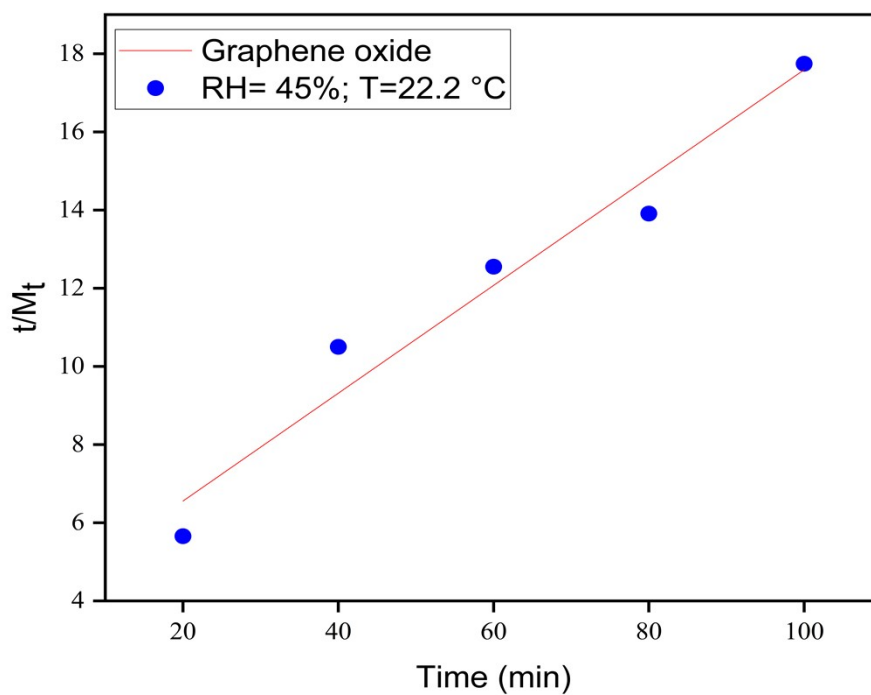

Figure S11: Pseudo 2<sup>nd</sup> order kinetics model for synthesized GO at a RH of 45 %

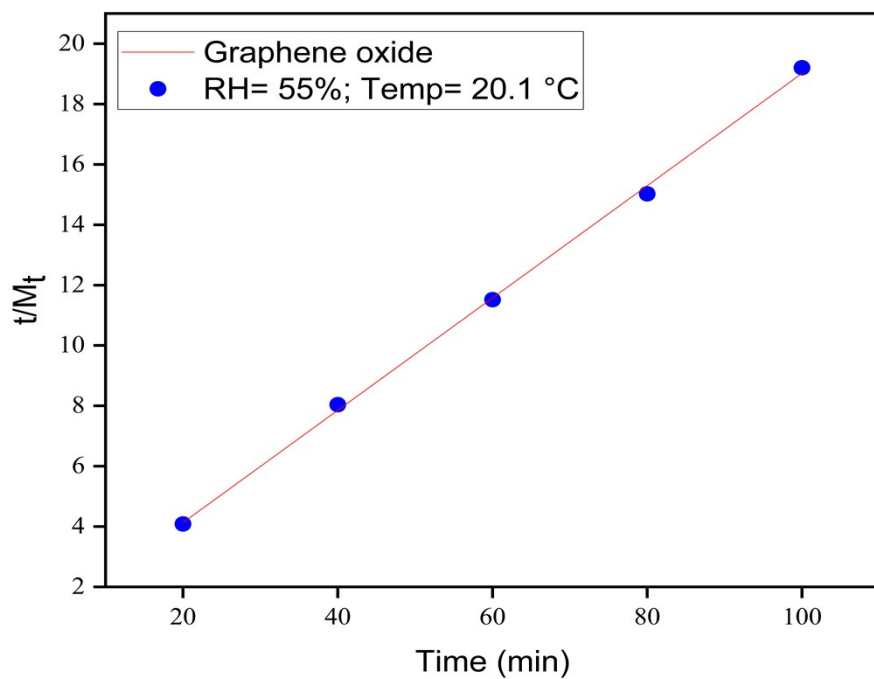

Figure S12: Pseudo 2<sup>nd</sup> order kinetics model for synthesized GO at a RH of 55%

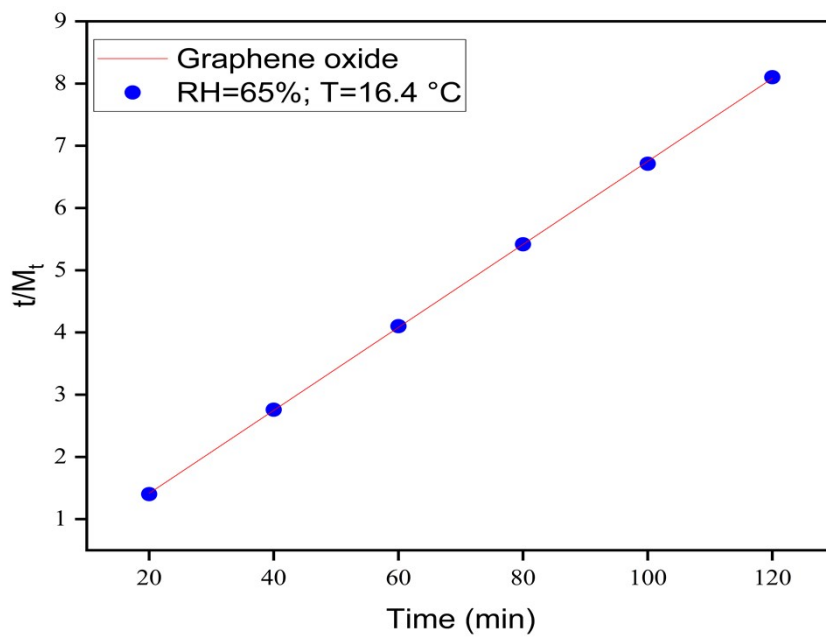

Figure S13: Pseudo 2<sup>nd</sup> order kinetics model for synthesized GO at a RH of 65 %

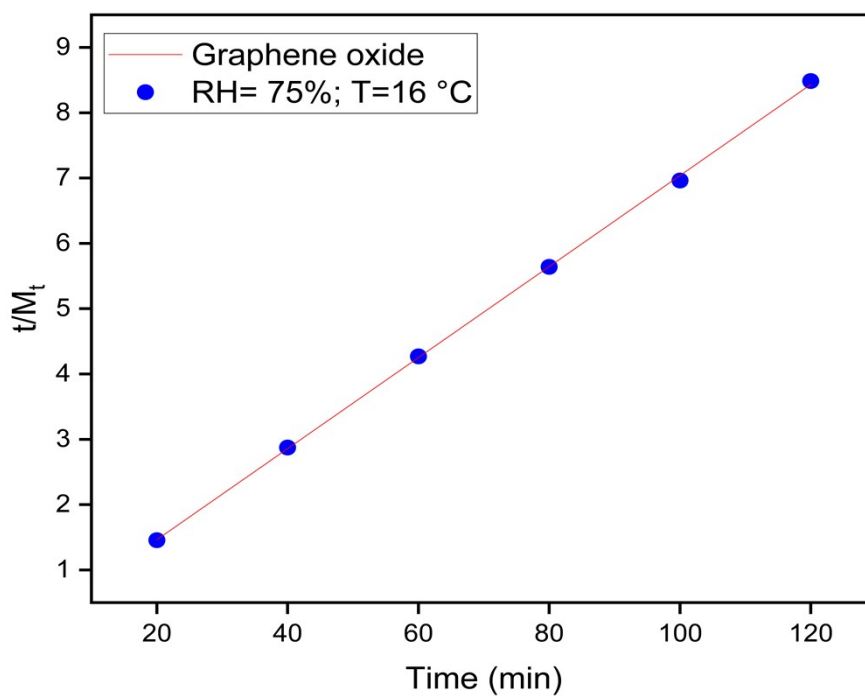

Figure S14: Pseudo 2<sup>nd</sup> order kinetics model for synthesized GO at a RH of 75 %

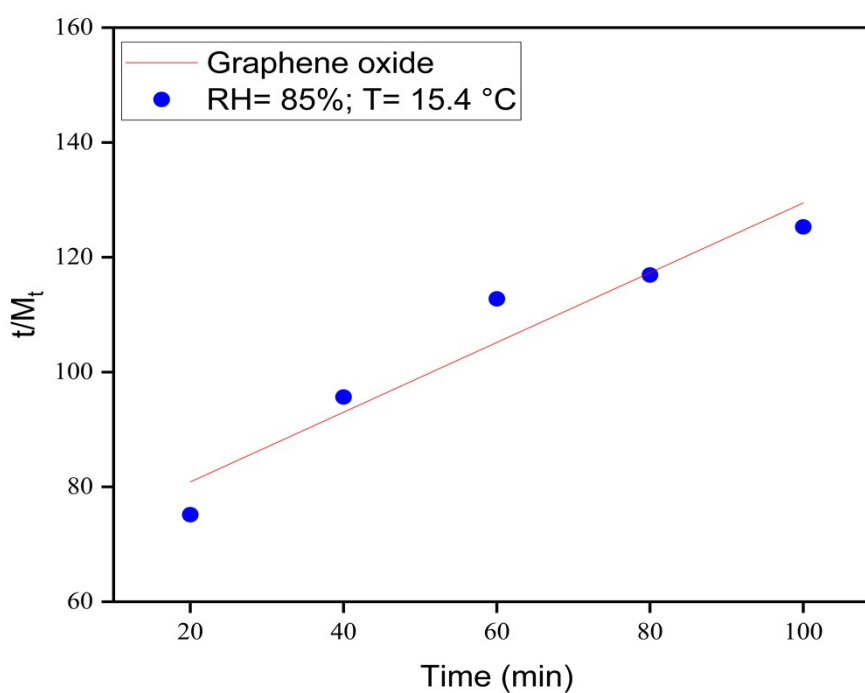

Figure S15: Pseudo 2<sup>nd</sup> order kinetics model for synthesized GO at a RH of 85 %



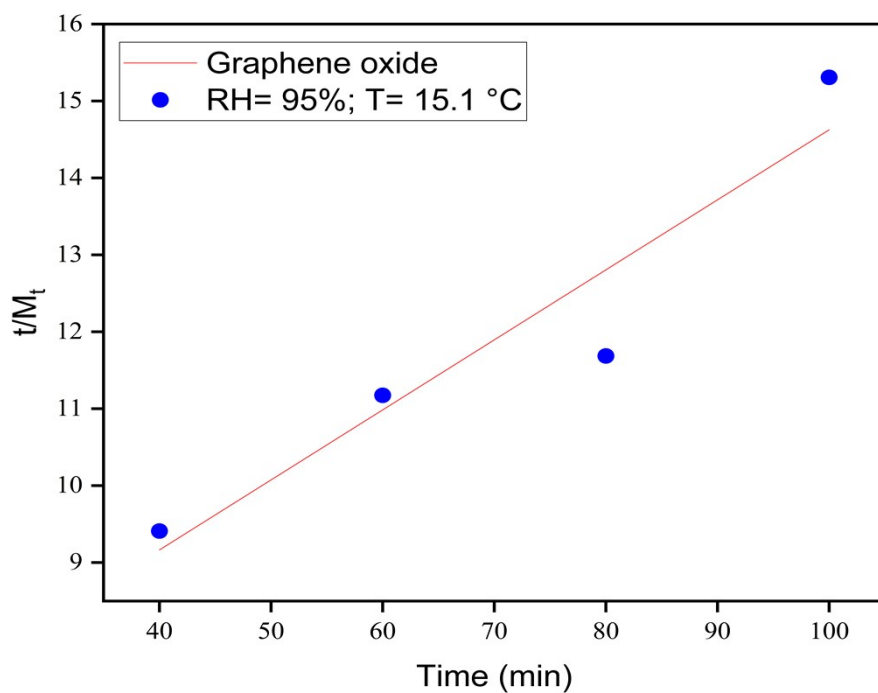

Figure S16: Pseudo 2<sup>nd</sup> order kinetics model for synthesized GO at a RH of 95 %

### MOF-5:

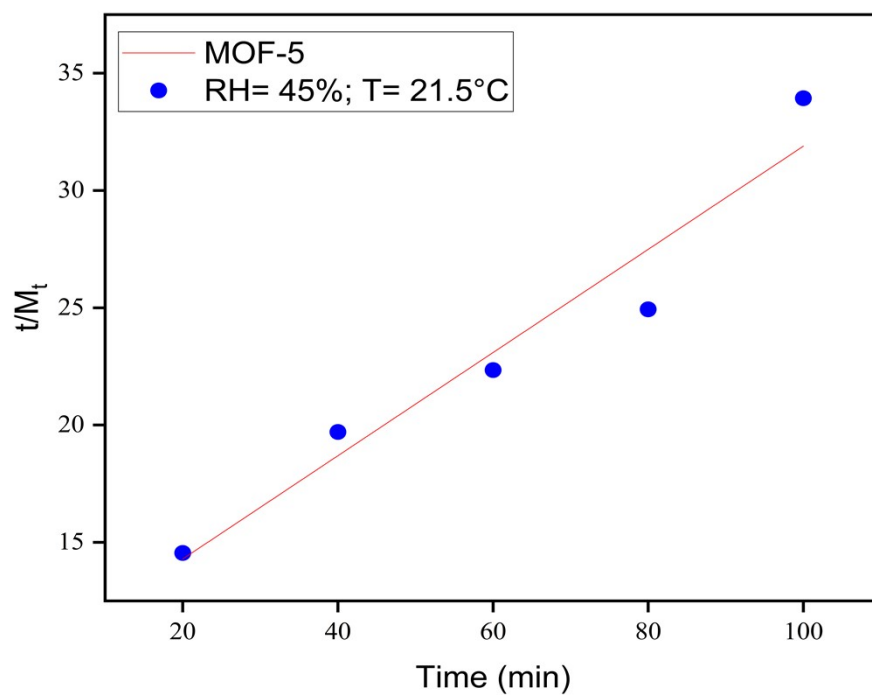

Figure S17: Pseudo 2<sup>nd</sup> order kinetics model for synthesized MOF-5 at a RH of 45 %

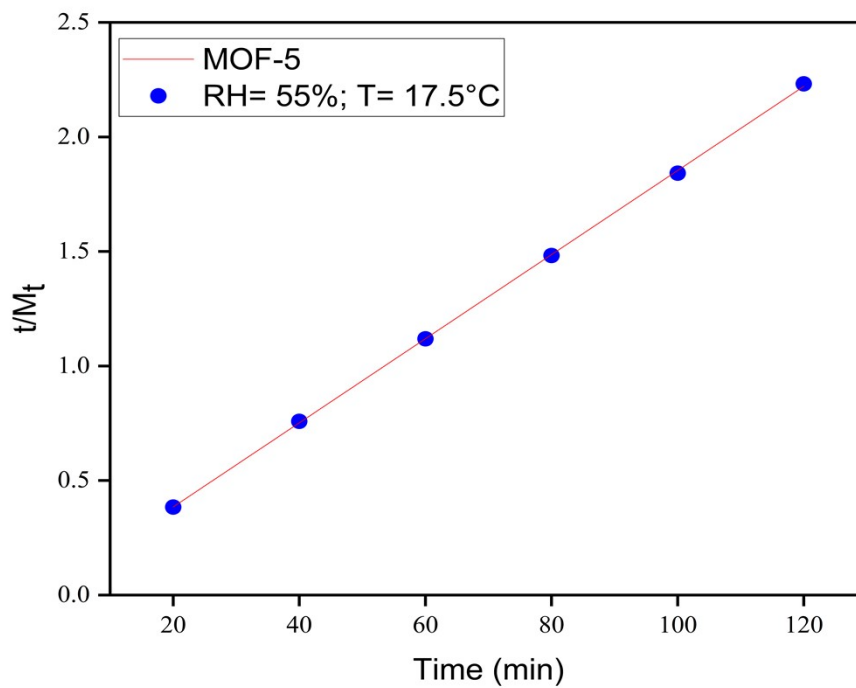

Figure S18: Pseudo 2<sup>nd</sup> order kinetics model for synthesized MOF-5 at a RH of 55 %

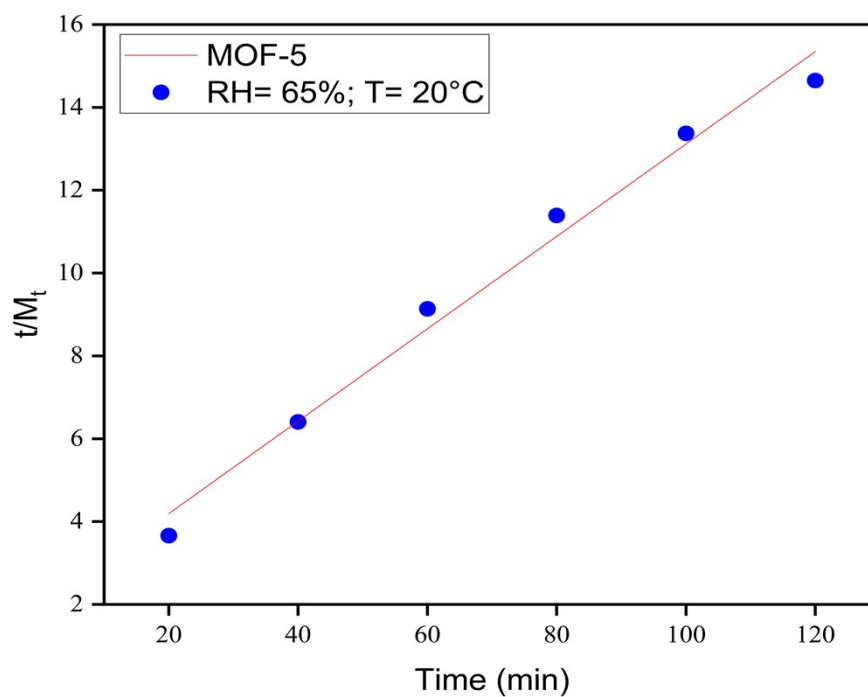

Figure S19: Pseudo 2<sup>nd</sup> order kinetics model for synthesized MOF-5 at a RH of 65 %

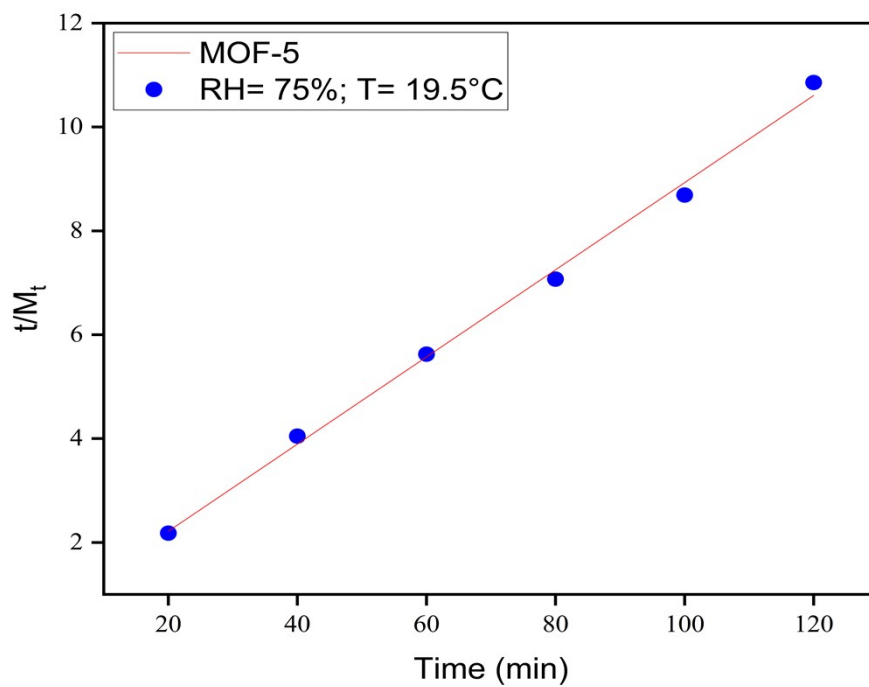

Figure S20: Pseudo 2<sup>nd</sup> order kinetics model for synthesized MOF-5 at a RH of 75 %

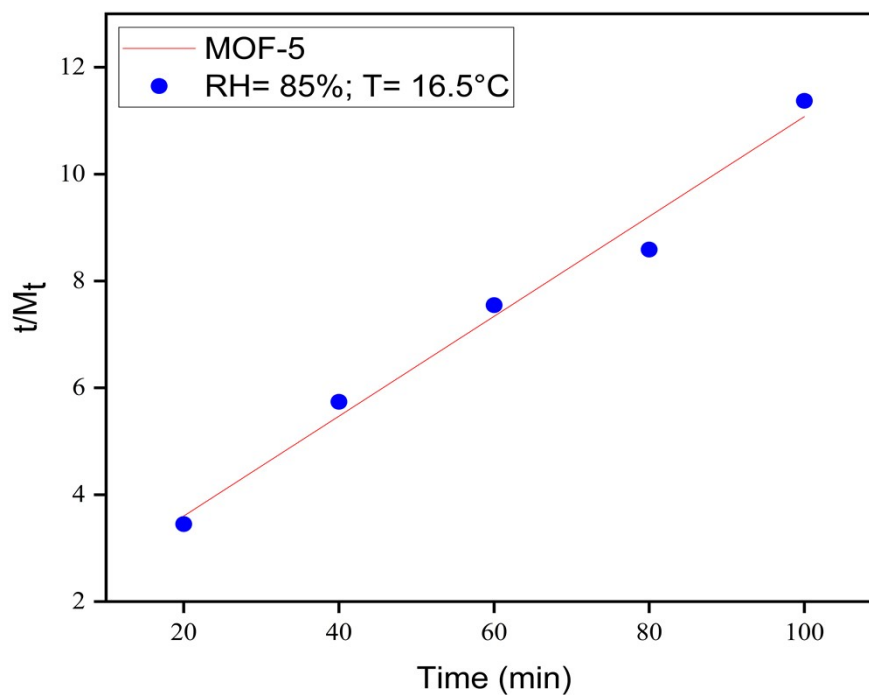

Figure S21: Pseudo 2<sup>nd</sup> order kinetics model for synthesized MOF-5 at a RH of 85 %

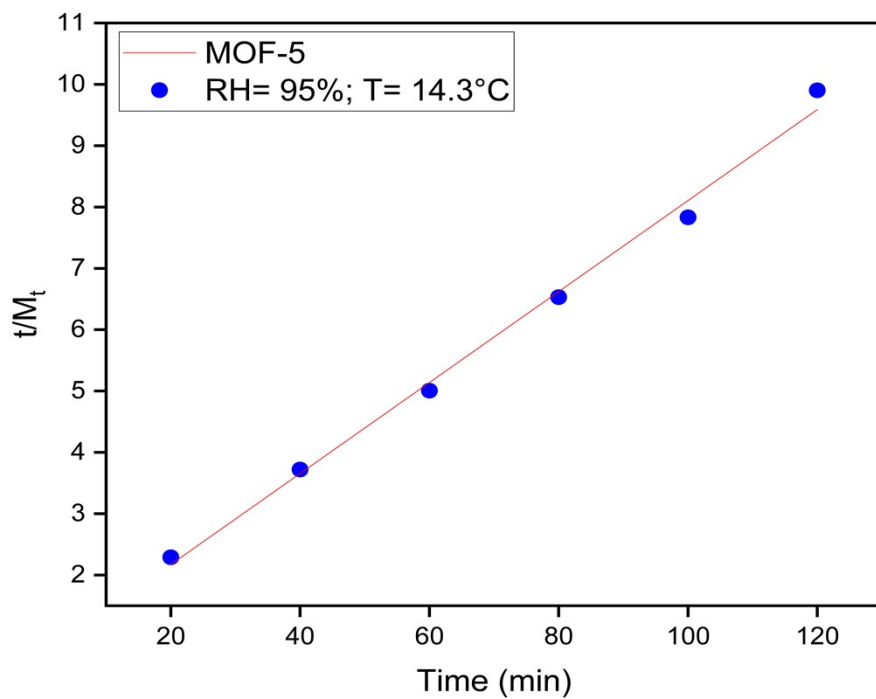

Figure S22: Pseudo 2<sup>nd</sup> order kinetics model for synthesized MOF-5 at a RH of 95 %

**MOF-5/ GO composite:**

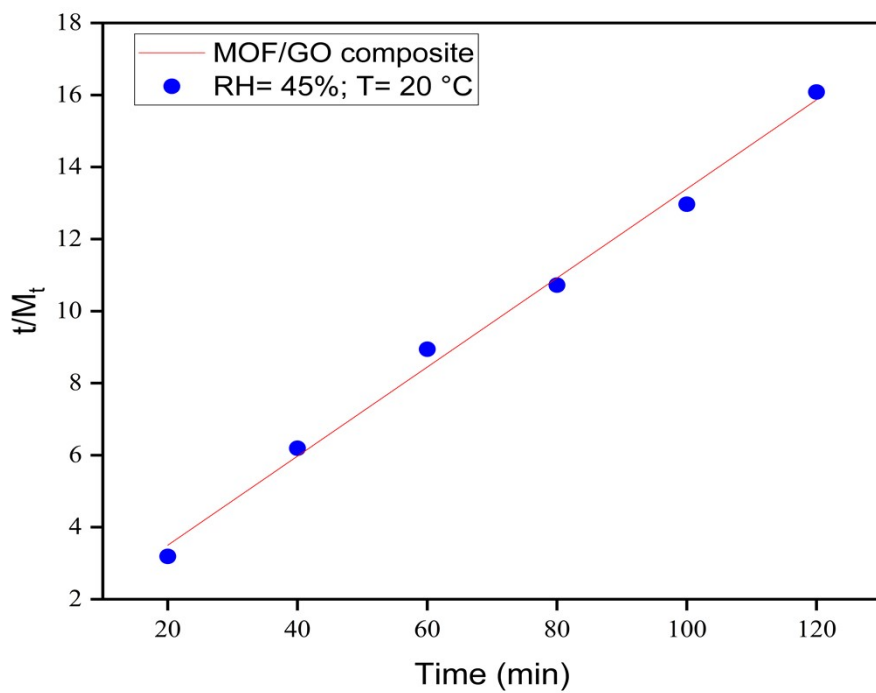

Figure S23: Pseudo 2<sup>nd</sup> order kinetics model for synthesized GO/MOF-5 composite at a RH of 45 %

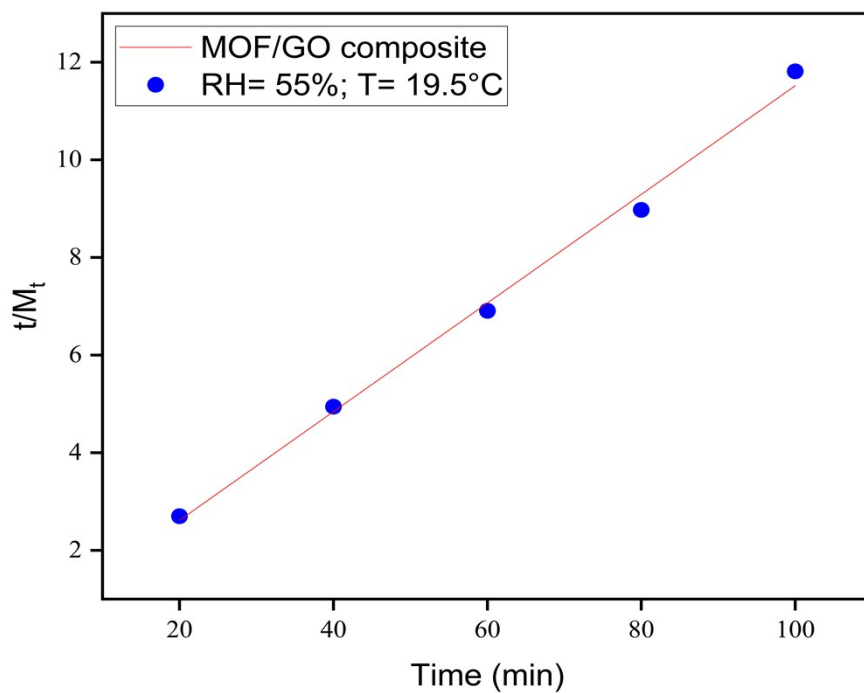

Figure S24: Pseudo 2nd order kinetics model for synthesized GO/MOF-5 composite at a RH of 55 %

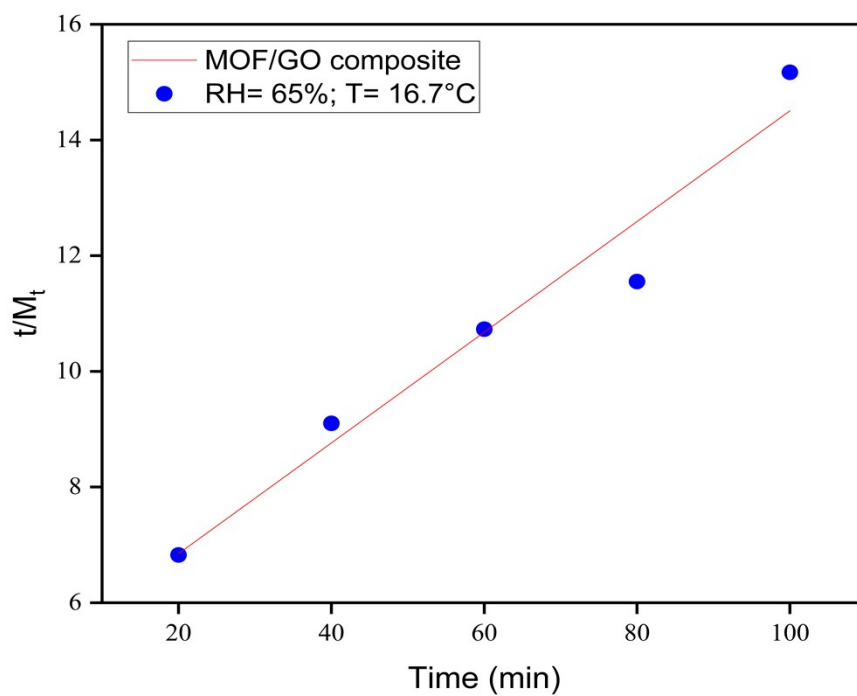

Figure S25: Pseudo 2nd order kinetics model for synthesized GO/MOF-5 composite at a RH of 65 %

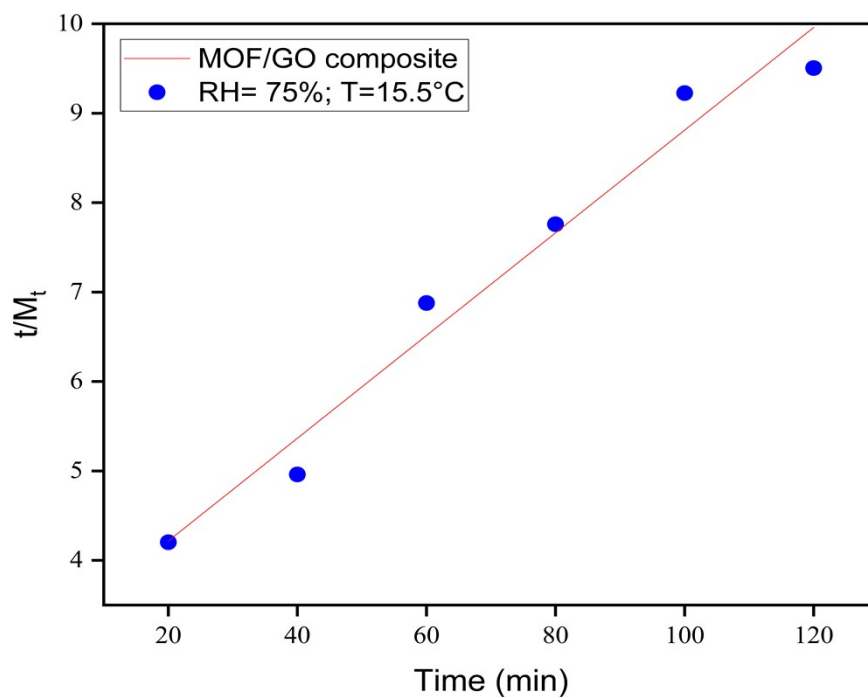

Figure S26: Pseudo 2nd order kinetics model for synthesized GO/MOF-5 composite at a RH of 75 %

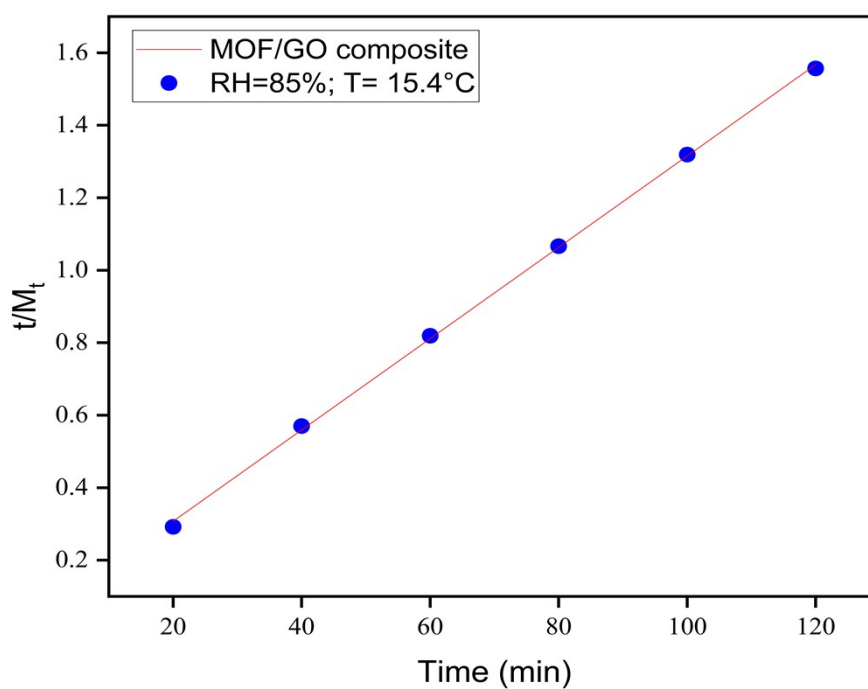

Figure S27: Pseudo 2nd order kinetics model for synthesized GO/MOF-5 composite at a RH of 85 %

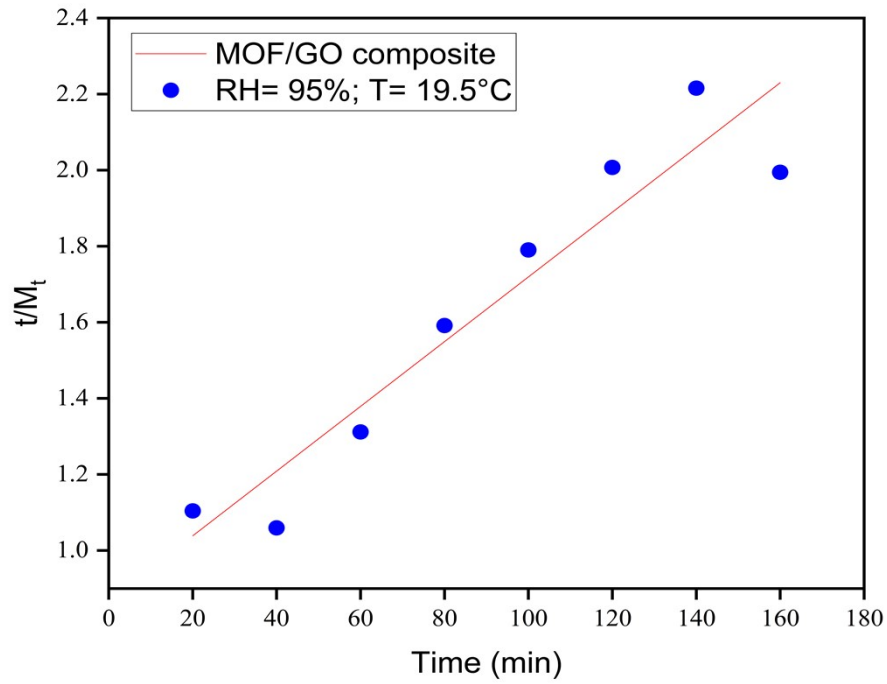

Figure S28: Pseudo 2nd order kinetics model for synthesized GO/MOF-5 composite at a RH of 95 %

Table S1: Comparison between Saturation point (S<sub>p</sub>) and Moisture content (M<sub>c</sub>) at different RH%

| Relative Humidity (%) | 45 ± 2                         | 55 ± 2                         | 65 ± 2                         | 75 ± 2                         | 85 ± 2                         | 95 ± 2                         |
|-----------------------|--------------------------------|--------------------------------|--------------------------------|--------------------------------|--------------------------------|--------------------------------|
| Material              | S <sub>p</sub> /M <sub>c</sub> | S <sub>p</sub> /M <sub>c</sub> | S <sub>p</sub> /M <sub>c</sub> | S <sub>p</sub> /M <sub>c</sub> | S <sub>p</sub> /M <sub>c</sub> | S <sub>p</sub> /M <sub>c</sub> |
| GO                    | 80/56                          | 80/53                          | 100/148                        | 80/141                         | 100/8                          | 80/60                          |
| MOF-5                 | 80/32                          | 100/542                        | 120/80                         | 100/115                        | 80/93                          | 100/127                        |
| GO/MOF-5 composite    | 100/77                         | 80/89                          | 80/69                          | 140/1137                       | 120/770                        | 160/802                        |

Table S2: Parameters for Pseudo 2nd order kinetics model of synthesized GO at different RH%

| Humidity (%) | Slope (m) | Intercept (c) | M <sub>c</sub> (Th) | M <sub>c</sub> (Exp) (mg/g) | k <sub>2</sub> (min <sup>-1</sup> ) |
|--------------|-----------|---------------|---------------------|-----------------------------|-------------------------------------|
|              |           |               |                     |                             |                                     |

|        |         |         |         |         |        |
|--------|---------|---------|---------|---------|--------|
| 45 ± 3 | 0.13793 | 3.79648 | 5.75204 | 7.2500  | 0.0050 |
| 55 ± 3 | 0.18609 | 0.40871 | 5.32452 | 5.3737  | 0.0847 |
| 65 ± 3 | 0.0666  | 0.0808  | 14.8993 | 14.9927 | 0.0550 |
| 75 ± 3 | 0.0697  | 0.0695  | 14.3624 | 14.3472 | 0.0698 |
| 85 ± 3 | 1.0054  | 50.1459 | 0.79818 | 0.9946  | 0.0201 |
| 95 ± 3 | 0.0910  | 5.5234  | 6.84564 | 10.9865 | 0.0014 |

Table S3: Parameters for Pseudo 2nd order kinetics model of synthesized MOF-5 at different RH%

| <b>Humidity (%)</b> | <b>Slope (m)</b> | <b>Intercept (c)</b> | <b>M<sub>e</sub> (Th)</b> | <b>M<sub>e</sub> (Exp) (mg/g)</b> | <b>k<sub>2</sub> (min<sup>-1</sup>)</b> |
|---------------------|------------------|----------------------|---------------------------|-----------------------------------|-----------------------------------------|
| 45 ± 3              | 4.53720          | 9.88877              | 100                       | 4.5372                            | 0.0049                                  |
| 55 ± 3              | 0.01836          | 0.0176               | 54.2913                   | 54.4662                           | 0.1915                                  |
| 65 ± 3              | 0.1115           | 1.9620               | 8.19246                   | 8.9653                            | 0.0634                                  |
| 75 ± 3              | 0.08392          | 0.53766              | 11.5086                   | 11.9161                           | 0.1309                                  |
| 85 ± 3              | 0.09345          | 1.73166              | 9.31596                   | 10.7009                           | 0.0050                                  |
| 95 ± 3              | 0.07417          | 0.6888               | 12.7687                   | 1.3482                            | 0.7987                                  |



Table S4: Parameters for Pseudo 2nd order kinetics model of synthesized GO/MOF-5 composite at different RH%

| <b>Humidity (%)</b> | <b>Slope (m)</b> | <b>Intercept (c)</b> | <b>M<sub>e</sub>(Th)</b> | <b>M<sub>e</sub>(Exp) (mg/g)</b> | <b>k<sub>2</sub>(min<sup>-1</sup>)</b> |
|---------------------|------------------|----------------------|--------------------------|----------------------------------|----------------------------------------|
| 45 ± 3              | 0.12367          | 1.02683              | 7.7116                   | 8.0860                           | 0.01488                                |
| 55 ± 3              | 0.11132          | 0.38769              | 8.91386                  | 8.9831                           | 0.03196                                |
| 65 ± 3              | 0.0957           | 4.93498              | 6.9241                   | 10.4993                          | 0.01856                                |
| 75 ± 3              | 0.05742          | 3.06936              | 13.7475                  | 17.4155                          | 0.01074                                |
| 85 ± 3              | 0.0126           | 0.05532              | 77.0654                  | 79.3651                          | 0.02869                                |
| 95 ± 3              | 0.00851          | 0.86554              | 80.2264                  | 117.5088                         | 8.338×10 <sup>-5</sup>                 |
